# Supplementary material for: Repurposing FDA approved drugs against the human fungal pathogen, Candida albicans
Source: PubMed Central journal article supplement (PMC4462072; doi:10.1186/s12941-015-0090-4), 2015-06-09

**Supplemental Table 1: Quantification of the zone of inhibition post-treatment of various drugs on *C. albicans* strain SN250.**

**A)**

| Drug                        | YPD 25°C                    |                  |                            | YPD 37°C                    |                  |                            |
|-----------------------------|-----------------------------|------------------|----------------------------|-----------------------------|------------------|----------------------------|
|                             | ZOI Area (mm <sup>2</sup> ) | Number of Pixels | ZOI Area/ Number of Pixels | ZOI Area (mm <sup>2</sup> ) | Number of Pixels | ZOI Area/ Number of Pixels |
| Fluconazole                 | 933.84 ± 5.92               | 77.55 ± 0.21     | 12.04 ± 0.03               | 822.65 ± 5.42               | 94.35 ± 0.11     | 8.72 ± 0.01                |
| Antimycin                   | 507.27 ± 5.31               | 81.57 ± 0.34     | 6.22 ± 0.09                | 541.4 ± 4.34                | 86.02 ± 0.24     | 6.29 ± 0.02                |
| Captan                      | 512.19 ± 4.31               | 74.1 ± 0.23      | 6.93 ± 0.02                | 579.1 ± 5.09                | 77.46 ± 0.25     | 7.48 ± 0.02                |
| Chlorquinaldol              | 194.72 ± 3.49               | 90.86 ± 0.22     | 2.14 ± 0.01                | 365.57 ± 4.54               | 86.19 ± 0.14     | 4.24 ± 0.01                |
| Clotrimazole                | 210.77 ± 3.21               | 95.71 ± 0.23     | 2.20 ± 0.01                | 317.16 ± 3.42               | 88.2 ± 0.15      | 3.6 ± 0.01                 |
| Disulfiram                  | 340.1 ± 5.13                | 74.44 ± 0.15     | 4.57 ± 0.01                | 123.25 ± 2.23               | 76.13 ± 0.19     | 1.62 ± 4.33 E-3            |
| Fluvastatin                 | 473.13 ± 2.45               | 85.84 ± 0.21     | 5.51 ± 0.01                | 639.93 ± 3.24               | 78.11 ± 0.12     | 8.19 ± 0.01                |
| Methylbenzethonium Chloride | 100 ± 2.1                   | 70.64 ± 0.28     | 1.42 ± 0.01                | 71.46 ± 4.21                | 66.66 ± 0.09     | 1.07 ± 2.08 E-3            |
| Miconazole                  | 170.98 ± 2.41               | 88.14 ± 0.31     | 1.94 ± 0.01                | 130.88 ± 3.54               | 88.92 ± 0.08     | 1.47 ± 1.72 E -3           |
| Mycophenolic Acid           | 422.4 ± 4.21                | 93.66 ± 0.32     | 4.51 ± 0.02                | 217.22 ± 3.41               | 96.66 ± 0.15     | 2.25 ± 3.84 E-3            |
| Nifuroxime                  | 31.61 ± 3.52                | 65.68 ± 0.39     | 0.48 ± 4.28 E-3            | 33.21 ± 1.43                | 85.1 ± 0.16      | 0.39 ± 9.02 E-4            |
| Nitroxoline                 | 275.28 ± 2.36               | 74.53 ± 0.39     | 3.69 ± 0.02                | 309.66 ± 2.56               | 68.44 ± 0.09     | 4.52 ± 0.01                |
| Octanoic Acid               | 46.25 ± 3.21                | 71.7 ± 0.32      | 0.65 ± 3.33 E-3            | 36.04 ± 3.69                | 63.83 ± 0.86     | 0.56 ± 0.01                |
| Octodrine                   | 34.32 ± 2.12                | 96.54 ± 0.21     | 0.36 ± 9.93 E-4            | 31.61 ± 2.13                | 77.91 ± 0.08     | 0.41 ± 6.90E -4            |
| Pyrrithione Zinc            | 695.95 ± 4.21               | 88.19 ± 0.26     | 7.89 ± 0.02                | 553.02 ± 2.94               | 76.17 ± 0.12     | 7.26 ± 0.01                |
| DMSO                        | 39.36 ± 1.45                | 86.17 ± 0.17     | 0.46 ± 1.07 E-3            | 34.32 ± 1.53                | 104.84 ± 0.09    | 0.33 ± 4.27 E-4            |

B)

| Drug                        | Serum 25°C                  |                  |                            | Serum 37°C                  |                  |                            |
|-----------------------------|-----------------------------|------------------|----------------------------|-----------------------------|------------------|----------------------------|
|                             | ZOI Area (mm <sup>2</sup> ) | Number of Pixels | ZOI Area/ Number of Pixels | ZOI Area (mm <sup>2</sup> ) | Number of Pixels | ZOI Area/ Number of Pixels |
| Fluconazole                 | 39.36 ± 1.31                | 59.34 ± 0.09     | 0.66 ± 1.22 E-3            | 36.41 ± 1.21                | 85.54 ± 0.04     | 0.43 ± 3.40 E-4            |
| Antimycin                   | 130.08 ± 2.58               | 77.61 ± 0.11     | 1.68 ± 2.71 E-3            | 309.42 ± 1.45               | 90.16 ± 0.21     | 3.43 ± 8.15 E-3            |
| Captan                      | 107.75 ± 2.31               | 86.49 ± 0.21     | 1.25 ± 3.29 E-3            | 89.55 ± 2.41                | 74.94 ± 0.12     | 1.19 ± 2.24 E-3            |
| Chlorquinaldol              | 148.83 ± 1.42               | 86.24 ± 0.18     | 1.73 ± 3.77 E-3            | 133.34 ± 1.23               | 75.17 ± 0.15     | 1.77 ± 3.70 E-3            |
| Clotrimazole                | 52.89 ± 2.14                | 87.04 ± 0.04     | 0.61 ± 5.25 E-4            | 123.87 ± 1.23               | 76.89 ± 0.12     | 1.61 ± 2.67 E-3            |
| Disulfiram                  | 113.53 ± 1.54               | 92.54 ± 0.21     | 1.23 ± 2.95 E-3            | 118.7 ± 0.12                | 83.610 ± 0.09    | 1.42 ± 1.54 E-3            |
| Fluvastatin                 | 123.25 ± 2.52               | 104.75 ± 0.02    | 1.18 ± 4.65 E-4            | 68.02 ± 1.03                | 106.74 ± 0.04    | 0.64 ± 3.35 E-4            |
| Methylbenzethonium Chloride | 86.84 ± 1.43                | 84.37 ± 0.23     | 1.03 ± 2.98 E-3            | 85.55 ± 1.52                | 73.96 ± 0.09     | 1.16 ± 1.61 E-3            |
| Miconazole                  | 64.7 ± 1.53                 | 95.27 ± 0.08     | 0.68 ± 7.31 E-4            | 55.84 ± 1.68                | 87.16 ± 0.12     | 0.64 ± 1.07 E-3            |
| Mycophenolic Acid           | 10.21 ± 1.04                | 99.84 ± 0.21     | 0.10 ± 3.19 E-4            | 34.32 ± 1.24                | 85.38 ± 0.14     | 0.4 ± 8.04 E-4             |
| Nifuroxime                  | 41.08 ± 2.14                | 88.15 ± 0.08     | 0.47 ± 6.66 E-4            | 49.94 ± 1.76                | 92.34 ± 0.17     | 0.54 ± 1.19 E-3            |
| Nitroxoline                 | 73.8 ± 0.98                 | 85.39 ± 0.12     | 0.86 ± 1.33 E-3            | 157.51 ± 2.41               | 83.71 ± 0.11     | 1.88 ± 4.11 E-3            |
| Octanoic Acid               | 39.36 ± 1.23                | 89.45 ± 0.03     | 0.44 ± 2.85 E-4            | 45.02 ± 1.94                | 93.96 ± 0.09     | 0.48 ± 7.67 E-4            |
| Octodrine                   | 56.83 ± 1.94                | 85.77 ± 0.12     | 0.66 ± 1.15 E-3            | 54.25 ± 1.04                | 89.58 ± 0.05     | 0.61 ± 7.25 E-4            |
| Pyrrithione Zinc            | 27.8 ± 1.34                 | 83.91 ± 0.05     | 0.33 ± 3.57 E-4            | 26.82 ± 0.89                | 63.7 ± 0.05      | 0.42 ± 4.70 E-4            |
| DMSO                        | 25.89 ± 1.56                | 89.3 ± 0.07      | 0.29 ± 4.02 E-4            | 20.173 ± 0.12               | 91.07 ± 0.08     | 0.22 ± 1.35 E-4            |

**Supplemental Table 2: Quantification of the zone of inhibition post-treatment of various serially diluted drugs on *C. albicans* strain SN250.**

| Concentration | Antimycin 25°C              |                  |                                  | Antimycin 37°C                 |                     |                                  |
|---------------|-----------------------------|------------------|----------------------------------|--------------------------------|---------------------|----------------------------------|
|               | ZOI Area (mm <sup>2</sup> ) | Number of Pixels | ZOI Area/<br>Number of<br>Pixels | ZOI Area<br>(mm <sup>2</sup> ) | Number of<br>Pixels | ZOI Area/<br>Number of<br>Pixels |
| 10            | 389.64 ± 2.95               | 97.05 ± 0.17     | 4.01 ± 3.61 E-3                  | 587 ± 3.41                     | 82.23 ± 0.31        | 7.14 ± 4.15 E-4                  |
| 5             | 314.07 ± 0.25               | 103.05 ± 0.33    | 3.05 ± 0.01                      | 501.21 ± 4.53                  | 82.77 ± 0.31        | 6.06 ± 0.02                      |
| 2.5           | 253.78 ± 1.63               | 114.26 ± 0.08    | 2.22 ± 6.56 E-3                  | 468.46 ± 4.17                  | 90.74 ± 0.36        | 5.16 ± 0.02                      |
| 1.25          | 221.87 ± 3.70               | 104.09 ± 0.35    | 2.13 ± 1.99 E-3                  | 423.45 ± 4.14                  | 93.29 ± 0.34        | 4.54 ± 0.02                      |
| 0.625         | 165.24 ± 1.68               | 91.07 ± 0.42     | 1.81 ± 7.16 E-3                  | 351.61 ± 2.14                  | 85.56 ± 0.48        | 4.11 ± 0.02                      |
| 0.3125        | 158.27 ± 1.69               | 86.58 ± 0.52     | 1.83 ± 9.06 E-3                  | 228.21 ± 4.01                  | 72.13 ± 0.22        | 3.16 ± 0.02                      |
| 0.15625       | 145.38 ± 1.41               | 88.69 ± 0.68     | 1.64 ± 9.77 E-3                  | 202.85 ± 1.48                  | 66.23 ± 0.52        | 3.06 ± 0.01                      |
| 0.07812       | 113.05 ± 2.00               | 82.93 ± 0.49     | 1.36 ± 0.901                     | 186.37 ± 1.14                  | 73.72 ± 0.21        | 2.53 ± 0.02                      |
| DMSO          | 35.13 ± 0.97                | 93.11 ± 0.69     | 0.38 ± 2.86 E-3                  | 43.81 ± 0.74                   | 86.72 ± 0.49        | 0.51 ± 1.31 E-3                  |
| 0.03906       | 66.56 ± 1.22                | 94.85 ± 0.77     | 0.7 ± 5.23 E-3                   | 114.1 ± 1.81                   | 89.48 ± 0.53        | 1.28 ± 7.19 E-3                  |
| 0.01953       | 50.29 ± 1.52                | 94.18 ± 0.23     | 0.53 ± 4.53 E-3                  | 81.14 ± 0.26                   | 84.7 ± 0.18         | 0.96 ± 6.03 E-3                  |
| 0.009765      | 43.612 ± 0.27               | 102.63 ± 0.66    | 0.42 ± 9.79 E-4                  | 76.91 ± 1.31                   | 93.56 ± 0.38        | 0.82 ± 1.72 E-3                  |
| 0.004883      | 40.338 ± 0.9                | 100.71 ± 0.32    | 0.33 ± 2.71 E-3                  | 50.29 ± 1.07                   | 97.53 ± 0.40        | 0.52 ± 2.12 E-3                  |
| 0.002441      | 31.91 ± 0.58                | 96.13 ± 0.37     | 0.33 ± 1.17 E-3                  | 39.2 ± 0.25                    | 102.42 ± 0.13       | 0.38 ± 1.52 E-3                  |
| 0.00061       | 30.85 ± 0.45                | 85.52 ± 0.09     | 0.36 ± 1.61 E-3                  | 35.08 ± 0.59                   | 96.16 ± 0.24        | 0.36 ± 5.55 E-4                  |
| 0.000305      | 26.2 ± 0.51                 | 92.19 ± 0.74     | 0.28 ± 3.33 E-4                  | 31.91 ± 0.36                   | 96.37 ± 0.27        | 0.33 ± 8.62 E-4                  |
| 0.000153      | 26.2 ± 0.78                 | 98.27 ± 0.36     | 0.27 ± 2.09 E-3                  | 30.85 ± 0.45                   | 104.64 ± 0.80       | 0.29 ± 8.04 E-4                  |
| DMSO          | 26.6 ± 0.42                 | 106.25 ± 0.47    | 0.25 ± 8.88E-4                   | 35.13 ± 0.53                   | 108.33 ± 0.09       | 0.32 ± 2.44 E-3                  |

| Concentration | Captan 25°C                 |                  |                            | Captan 37°C                 |                  |                            |
|---------------|-----------------------------|------------------|----------------------------|-----------------------------|------------------|----------------------------|
|               | ZOI Area (mm <sup>2</sup> ) | Number of Pixels | ZOI Area/ Number of Pixels | ZOI Area (mm <sup>2</sup> ) | Number of Pixels | ZOI Area/ Number of Pixels |
| 10            | 458.11 ± 1.52               | 84.93 ± 0.13     | 5.39 ± 1.79 E-4            | 375.7 ± 3.12                | 82.48 ± 0.31     | 4.56 ± 3.78 E-4            |
| 5             | 407.29 ± 2.38               | 86.16 ± 0.23     | 4.73 ± 7.41 E-3            | 260.33 ± 2.13               | 91.68 ± 0.12     | 2.84 ± 9.83 E-3            |
| 2.5           | 337.45 ± 2.12               | 96.46 ± 0.32     | 3.5 ± 8.56 E-3             | 107.34 ± 2.15               | 72.4 ± 0.12      | 1.48 ± 2.75 E-3            |
| 1.25          | 98.47 ± 3.45                | 94.77 ± 0.12     | 1.04 ± 3.87 E-3            | 92.13 ± 2.12                | 77.82 ± 0.06     | 1.18 ± 2.1 E-3             |
| 0.625         | 72.69 ± 1.58                | 86.47 ± 0.12     | 0.84 ± 1.35E-3             | 84.52 ± 2.11                | 68.6 ± 0.12      | 1.23 ± 1.74 E-3            |
| 0.3125        | 63.39 ± 4.12                | 78.14 ± .23      | 0.81 ± 1.77 E-3            | 63.39 ± 2.67                | 60.27 ± 0.11     | 1.05 ± 2.54 E-3            |
| 0.15625       | 48.18 ± 1.95                | 75.3 ± 0.15      | 0.64 ± 2.21 E-3            | 45.64 ± 2.12                | 72.43 ± 0.04     | 0.63 ± 1.25 E-3            |
| 0.07812       | 28.95 ± 1.34                | 87.55 ± 0.11     | 0.33 ± 7.20 E-4            | 31.91 ± 1.42                | 79.82 ± 0.12     | 0.4 ± 3.78 E-4             |
| DMSO          | 37.46 ± 1.54                | 122.79 ± 0.11    | 0.31 ± 3.99 E-4            | 44.02 ± 1.69                | 150.04 ± 0.08    | 0.29 ± 3.47 E-4            |

| Concentration | Chlorquinaldol 25°C         |                  |                            | Chlorquinaldol 37°C         |                  |                            |
|---------------|-----------------------------|------------------|----------------------------|-----------------------------|------------------|----------------------------|
|               | ZOI Area (mm <sup>2</sup> ) | Number of Pixels | ZOI Area/ Number of Pixels | ZOI Area (mm <sup>2</sup> ) | Number of Pixels | ZOI Area/ Number of Pixels |
| 10            | 314.84 ± 4.12               | 118.01 ± .18     | 2.67 ± 3.49 E-4            | 549.81 ± 6.12               | 85.94 ± .12      | 6.4 ± 7.12 E-4             |
| 5             | 277.44 ± 3.12               | 116.52 ± .12     | 2.38 ± 3.95 E-3            | 344 ± 4.95                  | 81.11 ± 0.24     | 4.24 ± 6.88 E-3            |
| 2.5           | 260.33 ± 3.98               | 119.05 ± 0.12    | 2.19 ± 2.54 E-3            | 198.2 ± 2.1                 | 83.7 ± 0.22      | 2.37 ± 7.04 E-3            |
| 1.25          | 239.83 ± 3.1                | 126.48 ± 0.06    | 1.9 ± 2.04 E-3             | 191.86 ± 2.8                | 90.97 ± 0.13     | 2.11 ± 5.41 E-3            |
| 0.625         | 208.77 ± 2.13               | 111.22 ± 0.08    | 1.88 ± 1.2 E-3             | 175.8 ± 2.1                 | 77.26 ± 0.21     | 2.28 ± 4.10 E-3            |
| 0.3125        | 158.27 ± 2.54               | 93.46 ± 0.12     | 1.69 ± 1.72 E-3            | 94.66 ± 2.63                | 66.06 ± 0.23     | 1.43 ± 4.95 E-3            |
| 0.15625       | 103.96 ± 2.12               | 101.97 ± 0.12    | 1.02 ± 1.41 E-3            | 32.96 ± 1.43                | 67.71 ± 0.12     | 0.49 ± 1.86 E-3            |
| 0.07812       | 30.85 ± 1.23                | 111.81 ± 0.06    | 0.28 ± 4.06 E-4            | 30.85 ± 1.21                | 80.98 ± 0.12     | 0.38 ± 7.14 E-4            |
| DMSO          | 32 ± 0.67                   | 123.24 ± 0.08    | 0.26 ± 1.81 E-4            | 31.96 ± 1.34                | 104.88 ± 0.11    | 0.3 ± 4.76 E-4             |

| Concentration | Clotrimazole 25°C           |                  |                            | Clotrimazole 37°C           |                  |                            |
|---------------|-----------------------------|------------------|----------------------------|-----------------------------|------------------|----------------------------|
|               | ZOI Area (mm <sup>2</sup> ) | Number of Pixels | ZOI Area/ Number of Pixels | ZOI Area (mm <sup>2</sup> ) | Number of Pixels | ZOI Area/ Number of Pixels |
| 10            | 181.93 ± 2.13               | 82.06 ± 0.12     | 2.22 ± 2.60 E-4            | 153.41 ± 2.14               | 88.79 ± 0.13     | 1.73 ± 2.41 E-4            |
| 5             | 175.38 ± 3.13               | 84.84 ± 0.21     | 2.07 ± 3.29 E-3            | 145.38 ± 3.56               | 92.97 ± 0.15     | 1.56 ± 2.91 E-3            |
| 2.5           | 165.24 ± 2.57               | 83.13 ± 0.12     | 1.99 ± 5.33 E-3            | 165.24 ± 3.12               | 98.91 ± 0.06     | 1.67 ± 2.85 E-3            |
| 1.25          | 149.6 ± 4.43                | 89.39 ± 0.04     | 1.67 ± 2.74 E-3            | 164.82 ± 2.12               | 105.39 ± 0.08    | 1.56 ± 1.09 E-3            |
| 0.625         | 145.8 ± 2.13                | 76.87 ± 0.03     | 1.9 ± 1.26 E-3             | 171.58 ± 3.01               | 85.44 ± 0.03     | 2.01 ± 2.23 E-3            |
| 0.3125        | 140.52 ± 1.23               | 65.72 ± 0.02     | 2.14 ± 1.16 E-3            | 141.15 ± 2.13               | 78.26 ± 0.09     | 1.8 ± 9.64 E-4             |
| 0.15625       | 113.05 ± 3.12               | 69.75 ± 0.10     | 1.62 ± 9.12 E-4            | 113.05 ± 1.43               | 79.76 ± 0.02     | 1.42 ± 1.78 E-3            |
| 0.07812       | 92.13 ± 2.12                | 71.34 ± 0.11     | 1.29 ± 2.11 E-3            | 103.33 ± 0.98               | 80.18 ± 0.13     | 1.29 ± 4.44 E-4            |
| DMSO          | 37.46 ± 0.81                | 123.69 ± 0.04    | 0.3 ± 3.35 E-4             | 30.9 ± 2.58                 | 95.69 ± 0.13     | 0.32 ± 7.08 E-4            |
| 0.03906       | 141.15 ± 2.13               | 80.66 ± 0.02     | 1.75 ± 1.13 E-3            | 108.61 ± 3.12               | 82.63 ± 0.15     | 1.31 ± 2.45 E-3            |
| 0.01953       | 108.61 ± 1.58               | 88.47 ± 0.05     | 1.23 ± 4.56 E-4            | 95.3 ± 2.12                 | 89.72 ± 0.25     | 1.06 ± 2.01 E-3            |
| 0.009765      | 94.66 ± 1.23                | 87.96 ± 0.12     | 1.08 ± 7.52 E-4            | 84.1 ± 2.53                 | 91.94 ± 0.12     | 0.91 ± 2.76 E-3            |
| 0.004883      | 81.14 ± 1.11                | 96.47 ± 0.08     | 0.84 ± 1.16 E-3            | 66.56 ± 1.42                | 96.49 ± 1.02     | 0.69 ± 1.01 E-3            |
| 0.002441      | 50.71 ± 1.47                | 79.27 ± 0.21     | 0.64 ± 8.31 E-4            | 45.64 ± 1.56                | 84.52 ± 0.93     | 0.54 ± 6.70 E-3            |
| 0.00061       | 40.57 ± 1.41                | 71.25 ± 0.11     | 0.57 ± 1.88E-3             | 35.08 ± 1.21                | 73.97 ± 0.31     | 0.47 ± 6.13 E-3            |
| 0.000305      | 37.4 ± 1.41                 | 79.57 ± 0.05     | 0.47 ± 8.27 E-4            | 32.96 ± 1.94                | 76.95 ± 0.11     | 0.43 ± 1.98 E-3            |
| 0.000153      | 32.96 ± 1.03                | 86.18 ± 0.89     | 0.38 ± 3.41 E-4            | 23.67 ± 1.03                | 86.21 ± 0.84     | 0.27 ± 4.7 E-4             |
| DMSO          | 34.71 ± 1.76                | 80.82 ± 0.12     | 0.43 ± 4.95 E-3            | 33.02 ± 1.42                | 92.14 ± 0.62     | 0.36 ± 3.42 E-3            |

|               | Disulfiram 25°C             |                  |                            | Disulfiram 37°C             |                  |                            |
|---------------|-----------------------------|------------------|----------------------------|-----------------------------|------------------|----------------------------|
| Concentration | ZOI Area (mm <sup>2</sup> ) | Number of Pixels | ZOI Area/ Number of Pixels | ZOI Area (mm <sup>2</sup> ) | Number of Pixels | ZOI Area/ Number of Pixels |
| 10            | 181.72 ± 3.21               | 64.79 ± 0.21     | 2.8 ± 4.95 E-4             | 103.33 ± 1.32               | 76.23 ± 0.44     | 1.36 ± 1.73 E-4            |
| 5             | 150.24 ± 2.12               | 70.57 ± 0.23     | 2.13 ± 6.64 E-3            | 35.08 ± 1.11                | 71.66 ± 0.21     | 0.49 ± 3.16 E-3            |
| 2.5           | 40.57 ± 1.64                | 82.34 ± 0.21     | 0.49 ± 1.58 E-3            | 34.65 ± 1.33                | 83.49 ± 0.05     | 0.42 ± 1.20 E-3            |
| 1.25          | 37.19 ± 1.54                | 74.6 ± 0.24      | 0.5 ± 1.61 E-3             | 35.08 ± 0.08                | 99.74 ± 0.21     | 0.35 ± 1.84 E-4            |
| 0.625         | 36.34 ± 1.08                | 84.62 ± 0.07     | 0.43 ± 1.35 E-3            | 32.96 ± 0.92                | 65.73 ± 0.13     | 0.5 ± 1.74 E-3             |
| 0.3125        | 35.08 ± 2.42                | 60.39 ± 0.07     | 0.58 ± 1.07 E-3            | 28.1 ± 0.87                 | 76.44 ± 0.23     | 0.37 ± 7.39 E-4            |
| 0.15625       | 29.58 ± 2.09                | 63.93 ± 0.09     | 0.46 ± 8.34 E-4            | 32.96 ± 1.21                | 75.73 ± 0.18     | 0.44 ± 1.48 E-3            |
| 0.07812       | 28.74 ± 1.03                | 82.05 ± 0.05     | 0.35 ± 5.10 E-4            | 31.27 ± 0.85                | 90.23 ± 0.23     | 0.35 ± 7.86 E-4            |
| DMSO          | 32.02 ± 0.78                | 95 ± 0.12        | 0.34 ± 2.60 E-4            | 33.02 ± 0.68                | 100.6 ± 0.15     | 0.33 ± 8.18 E-4            |

|               | Fluconazole 25°C            |                  |                            | Fluconazole 37°C            |                  |                            |
|---------------|-----------------------------|------------------|----------------------------|-----------------------------|------------------|----------------------------|
| Concentration | ZOI Area (mm <sup>2</sup> ) | Number of Pixels | ZOI Area/ Number of Pixels | ZOI Area (mm <sup>2</sup> ) | Number of Pixels | ZOI Area/ Number of Pixels |
| 10            | 626.73 ± 5.12               | 88.91 ± 0.14     | 7.05 ± 5.76 E-4            | 721.6 ± 5.12                | 97.31 ± 0.07     | 7.42 ± 5.26 E-4            |
| 5             | 491.49 ± 4.21               | 95.02 ± 0.44     | 5.17 ± 8.06 E-3            | 494.03 ± 6.12               | 100.2 ± 0.12     | 4.93 ± 4.06 E-3            |
| 2.5           | 406.55 ± 4.82               | 106.75 ± 0.32    | 3.81 ± 1.61 E-2            | 314.84 ± 3.59               | 113.9 ± 0.32     | 2.76 ± 3.23 E-3            |
| 1.25          | 375.28 ± 3.16               | 107.25 ± 0.08    | 3.5 ± 1.07 E-2             | 216.16 ± 3.21               | 112.1 ± 0.18     | 1.93 ± 5.79 E-3            |
| 0.625         | 215.53 ± 1.25               | 107.53 ± 0.46    | 2 ± 1.61 E-3               | 141.15 ± 1.69               | 93.67 ± 0.13     | 1.51 ± 3.08 E-3            |
| 0.3125        | 81.14 ± 1.05                | 97.21 ± 0.08     | 0.83 ± 4.06 E-3            | 63.39 ± 1.42                | 86.84 ± 0.29     | 0.73 ± 1.31 E-3            |
| 0.15625       | 30.85 ± 0.54                | 97.07 ± 0.03     | 0.32 ± 3.18 E-4            | 48.39 ± 0.98                | 107.39 ± 0.22    | 0.45 ± 2.57 E-3            |
| 0.07812       | 31.91 ± 1.57                | 122.23 ± 0.06    | 0.26 ± 1.93 E-4            | 40.57 ± 1.95                | 98.51 ± 0.08     | 0.41 ± 1.12 E-3            |
| DMSO          | 37.25 ± 0.96                | 119.78 ± 0.04    | 0.31 ± 2.36 E-4            | 39.46 ± 1.42                | 115.93 ± 0.06    | 0.34 ± 3.57 E-4            |

|               | Fluvastatin 25°C            |                  |                            | Fluvastatin 37°C            |                  |                            |
|---------------|-----------------------------|------------------|----------------------------|-----------------------------|------------------|----------------------------|
| Concentration | ZOI Area (mm <sup>2</sup> ) | Number of Pixels | ZOI Area/ Number of Pixels | ZOI Area (mm <sup>2</sup> ) | Number of Pixels | ZOI Area/ Number of Pixels |
| 10            | 48.18 ± 2.13                | 72.52 ± 0.03     | 0.66 ± 2.94 E-4            | 484.31 ± 4.42               | 72.55 ± 0.04     | 6.68 ± 6.09 E-4            |
| 5             | 43.95 ± 2.49                | 74.25 ± 0.02     | 0.59 ± 5.75 E-4            | 407.82 ± 3.42               | 82.28 ± 0.14     | 4.96 ± 2.83 E-3            |
| 2.5           | 37.4 ± 1.23                 | 81.88 ± 0.05     | 0.46 ± 2.62 E-4            | 381.19 ± 2.43               | 85.75 ± 0.21     | 4.45 ± 0.01                |
| 1.25          | 43.95 ± 0.93                | 86.93 ± 0.13     | 0.51 ± 3.98 E-4            | 286.11 ± 1.23               | 89.35 ± 0.11     | 3.2 ± 7.66 E-3             |
| 0.625         | 48.18 ± 1.42                | 96.48 ± 0.21     | 0.5 ± 8.20 E-4             | 216.16 ± 2.41               | 75.34 ± 0.06     | 2.87 ± 4.51 E-3            |
| 0.3125        | 45.64 ± 0.34                | 71.42 ± 0.31     | 0.64 ± 1.93 E-3            | 186.37 ± 2.65               | 68.63 ± 0.32     | 2.72 ± 2.76 E-3            |
| 0.15625       | 35.08 ± 0.13                | 75.21 ± 0.12     | 0.47 ± 1.94 E-3            | 129.11 ± 1.69               | 69.07 ± 0.31     | 1.87 ± 8.90 E-3            |
| 0.07812       | 31.91 ± 0.08                | 74.05 ± 0.21     | 0.43 ± 7.09 E-4            | 129.92 ± 3.21               | 67.74 ± 0.12     | 1.92 ± 9.25 E-3            |
| DMSO          | 33.62 ± 0.12                | 75.64 ± 0.07     | 0.44 ± 1.25 E-3            | 28.99 ± 1.02                | 93.59 ± 0.12     | 0.31 ± 5.06 E-4            |

|               | Methylbenzethonium Chloride 25°C |                  |                            | Methylbenzethonium Chloride 37°C |                  |                            |
|---------------|----------------------------------|------------------|----------------------------|----------------------------------|------------------|----------------------------|
| Concentration | ZOI Area (mm <sup>2</sup> )      | Number of Pixels | ZOI Area/ Number of Pixels | ZOI Area (mm <sup>2</sup> )      | Number of Pixels | ZOI Area/ Number of Pixels |
| 10            | 121.71 ± 1.46                    | 61.23 ± 0.12     | 1.99 ± 2.38 E-4            | 92.13 ± 1.04                     | 69.39 ± 0.02     | 1.33 ± 1.5 E-4             |
| 5             | 99.74 ± 0.59                     | 60.78 ± 0.06     | 1.64 ± 3.34 E-3            | 80.3 ± 1.41                      | 76.06 ± 0.08     | 1.06 ± 4.63 E-4            |
| 2.5           | 66.56 ± 0.74                     | 63.06 ± 0.21     | 1.06 ± 1.12 E-3            | 57.9 ± 1.32                      | 68.63 ± 0.13     | 0.84 ± 1.18 E-3            |
| 1.25          | 45.64 ± 0.84                     | 66.26 ± 0.19     | 0.69 ± 2.31 E-3            | 47.54 ± 1.09                     | 72.52 ± 0.14     | 0.66 ± 1.33 E-3            |
| 0.625         | 30.85 ± 1.04                     | 82.81 ± 0.09     | 0.37 ± 9.80 E-4            | 44.37 ± 0.98                     | 84.45 ± 0.05     | 0.53 ± 9.87 E-4            |
| 0.3125        | 31.91 ± 0.23                     | 77.26 ± 0.08     | 0.41 ± 5.11 E-4            | 29.58 ± 0.78                     | 82.05 ± 0.07     | 0.36 ± 3.15 E-4            |
| 0.15625       | 30.85 ± 0.95                     | 71.97 ± 0.02     | 0.43 ± 6.08 E-4            | 30.85 ± 0.19                     | 89.59 ± 0.12     | 0.34 ± 2.9 E-4             |
| 0.07812       | 31.91 ± 0.53                     | 86.09 ± 0.09     | 0.37 ± 1.48 E-4            | 24.3 ± 1.32                      | 100.09 ± 0.08    | 0.24 ± 4.23 E-4            |
| DMSO          | 35.13 ± 0.23                     | 93.16 ± 0.09     | 0.38 ± 3.89 E-4            | 31.96 ± 1.03                     | 102.71 ± 0.04    | 0.31 ± 3.43 E-4            |

|               | Miconazole 25°C             |                  |                            | Miconazole 37°C             |                  |                            |
|---------------|-----------------------------|------------------|----------------------------|-----------------------------|------------------|----------------------------|
| Concentration | ZOI Area (mm <sup>2</sup> ) | Number of Pixels | ZOI Area/ Number of Pixels | ZOI Area (mm <sup>2</sup> ) | Number of Pixels | ZOI Area/ Number of Pixels |
| 10            | 108.61 ± 1.32               | 46.07 ± 0.03     | 2.36 ± 2.87 E-4            | 108.61 ± 5.48               | 81.88 ± 0.02     | 1.33 ± 6.69 E-4            |
| 5             | 92.13 ± 1.43                | 48.82 ± 0.12     | 1.89 ± 1.45 E-3            | 99.74 ± 1.32                | 87.44 ± 0.01     | 1.14 ± 4.12 E-4            |
| 2.5           | 84.52 ± 1.49                | 59.34 ± 0.14     | 1.42 ± 3.13 E-3            | 91.71 ± 1.43                | 89.97 ± 0.12     | 1.02 ± 2.72 E-4            |
| 1.25          | 88.96 ± 1.46                | 60.83 ± 0.08     | 1.46 ± 3.61 E-3            | 91.71 ± 1.23                | 90.9 ± 0.09      | 1.01 ± 1.47 E-3            |
| 0.625         | 84.1 ± 1.31                 | 65.02 ± 0.04     | 1.29 ± 1.79 E-3            | 95.3 ± 0.98                 | 90.82 ± 0.21     | 1.05 ± 1.15 E-3            |
| 0.3125        | 80.93 ± 1.23                | 57.31 ± 0.23     | 1.41 ± 1.20 E-3            | 84.52 ± 0.84                | 73.78 ± 0.18     | 1.15 ± 3.37 E-3            |
| 0.15625       | 73.75 ± 0.90                | 54.9 ± 0.21      | 1.34 ± 5.79 E-3            | 73.75 ± 1.29                | 71.06 ± 0.14     | 1.04 ± 2.81 E-3            |
| 0.07812       | 66.77 ± 0.08                | 52.01 ± 0.12     | 1.28 ± 5.20 E-3            | 54.09 ± 1.04                | 87.27 ± 0.21     | 0.62 ± 1.11 E-3            |
| DMSO          | 35.13 ± 0.58                | 63.24 ± 0.18     | 0.56 ± 1.15 E-3            | 26.24 ± 1.03                | 87.03 ± 0.08     | 0.3 ± 8.46 E-4             |
| 0.03906       | 73.75 ± 1.53                | 92.62 ± 0.03     | 0.8 ± 1.71 E-3             | 47.54 ± 1.81                | 94.41 ± 0.03     | 0.5 ± 6.18 E-4             |
| 0.01953       | 69.73 ± 2.08                | 96.8 ± 0.09      | 0.72 ± 4.38 E-4            | 39.3 ± 1.18                 | 107.03 ± 0.18    | 0.37 ± 2.13 E-4            |
| 0.009765      | 56.63 ± 1.74                | 102.95 ± 0.14    | 0.55 ± 6.50 E-4            | 27.05 ± 1.09                | 113.44 ± 0.09    | 0.24 ± 4.74 E-4            |
| 0.004883      | 55.78 ± 1.43                | 110.23 ± 0.05    | 0.51 ± 7.72 E-4            | 20.5 ± 1.03                 | 122.95 ± 0.07    | 0.17 ± 2.06 E-4            |
| 0.002441      | 43.74 ± 1.48                | 113.07 ± 0.03    | 0.39 ± 3.02 E-4            | 21.55 ± 0.93                | 124.48 ± 0.03    | 0.17 ± 1.72 E-4            |
| 0.00061       | 30.85 ± 1.85                | 97.49 ± 0.04     | 0.32 ± 2.87 E-4            | 30.85 ± 0.83                | 103.51 ± 0.11    | 0.3 ± 1.67 E-4             |
| 0.000305      | 28.1 ± 0.94                 | 99.35 ± 0.07     | 0.28 ± 2.08 E-4            | 18.6 ± 1.21                 | 93.57 ± 0.12     | 0.2 ± 3.63 E-4             |
| 0.000153      | 31.91 ± 1.34                | 103.46 ± 0.14    | 0.31 ± 3.38 E-4            | 28.95 ± 1.04                | 106.1 ± 0.08     | 0.27 ± 4.07 E-4            |
| DMSO          | 30.9 ± 1.48                 | 112.13 ± 0.09    | 0.28 ± 4.76 E-4            | 24.34 ± 1.02                | 111.68 ± 0.19    | 0.22 ± 2.47 E-4            |



| Concentration | Mycophenolic Acid 25°C      |                  |                            | Mycophenolic Acid 37°C      |                  |                            |
|---------------|-----------------------------|------------------|----------------------------|-----------------------------|------------------|----------------------------|
|               | ZOI Area (mm <sup>2</sup> ) | Number of Pixels | ZOI Area/ Number of Pixels | ZOI Area (mm <sup>2</sup> ) | Number of Pixels | ZOI Area/ Number of Pixels |
| 10            | 300.47 ± 4.12               | 116.81 ± 0.13    | 2.57 ± 3.53 E-4            | 468.46 ± 5.43               | 105.77 ± 0.02    | 4.43 ± 5.13 E-4            |
| 5             | 266.24 ± 3.14               | 106.15 ± 0.21    | 2.51 ± 3.37 E-3            | 202.85 ± 4.23               | 109.95 ± 0.04    | 1.84 ± 7.20 E-4            |
| 2.5           | 159.11 ± 1.94               | 116.01 ± 0.09    | 1.37 ± 2.65 E-3            | 113.05 ± 1.40               | 118.06 ± 0.03    | 0.96 ± 4.43 E-4            |
| 1.25          | 47.54 ± 0.58                | 116.17 ± 0.10    | 0.41 ± 3.67 E-4            | 37.4 ± 1.23                 | 119.94 ± 0.12    | 0.31 ± 1.81 E-4            |
| 0.625         | 31.91 ± 0.64                | 109.13 ± 0.13    | 0.29 ± 3.27 E-4            | 16.69 ± 1.09                | 103.46 ± 0.04    | 0.16 ± 2.92 E-4            |
| 0.3125        | 45.64 ± 1.74                | 96.83 ± 0.04     | 0.47 ± 8.13 E-4            | 21.98 ± 1.02                | 87.21 ± 0.13     | 0.25 ± 2.33 E-4            |
| 0.15625       | 32.96 ± 0.65                | 89.3 ± 0.09      | 0.37 ± 2.38 E-4            | 26.2 ± 0.98                 | 90.82 ± 0.05     | 0.29 ± 5.21 E-4            |
| 0.07812       | 32.96 ± 0.98                | 99.35 ± 0.08     | 0.33 ± 3.99 E-4            | 30.85 ± 0.87                | 106.51 ± 0.02    | 0.29 ± 2.18 E-4            |
| DMSO          | 37.46 ± 1.23                | 115.57 ± 0.19    | 0.32 ± 3.31 E-4            | 30.9 ± 1.21                 | 116.85 ± 0.08    | 0.26 ± 1.49 E-4            |

| Concentration | Nifuroxime 25°C             |                  |                            | Nifuroxime 37°C             |                  |                            |
|---------------|-----------------------------|------------------|----------------------------|-----------------------------|------------------|----------------------------|
|               | ZOI Area (mm <sup>2</sup> ) | Number of Pixels | ZOI Area/ Number of Pixels | ZOI Area (mm <sup>2</sup> ) | Number of Pixels | ZOI Area/ Number of Pixels |
| 10            | 117.91 ± 1.21               | 82.44 ± 0.04     | 1.43 ± 1.47 E-4            | 30.85 ± 2.31                | 68.18 ± 0.05     | 0.45 ± 3.39 E-4            |
| 5             | 37.19 ± 1.48                | 85.47 ± 0.09     | 0.44 ± 3.77 E-4            | 28.95 ± 2.03                | 91.1 ± 0.02      | 0.32 ± 3.97 E-4            |
| 2.5           | 26.2 ± 1.25                 | 86.26 ± 0.14     | 0.3 ± 4.62 E-4             | 30.85 ± 1.24                | 91.86 ± 0.08     | 0.34 ± 2.08 E-4            |
| 1.25          | 35.08 ± 1.02                | 106.37 ± 0.21    | 0.33 ± 5.30 E-4            | 28.95 ± 1.49                | 97.82 ± 0.21     | 0.3 ± 3.94 E-4             |
| 0.625         | 31.91 ± 1.92                | 77.87 ± 0.16     | 0.41 ± 1.35 E-3            | 37.4 ± 1.09                 | 90.09 ± 0.06     | 0.42 ± 1.09 E-3            |
| 0.3125        | 37.4 ± 1.32                 | 79.83 ± 0.04     | 0.47 ± 1.10 E-3            | 37.19 ± 1.24                | 72.98 ± 0.12     | 0.51 ± 5.89 E-4            |
| 0.15625       | 32.96 ± 1.25                | 72.67 ± 0.21     | 0.45 ± 4.22 E-4            | 28.95 ± 0.78                | 79.51 ± 0.08     | 0.36 ± 6.58 E-4            |
| 0.07812       | 31.91 ± 0.89                | 85.06 ± 0.09     | 0.38 ± 1.03 E-3            | 26.2 ± 1.13                 | 88.64 ± 0.08     | 0.3 ± 3.94 E-4             |
| DMSO          | 37.46 ± 0.92                | 98.91 ± 0.11     | 0.38 ± 4.38 E-4            | 47.62 ± 1.04                | 99.82 ± 0.23     | 0.48 ± 4.87 E-4            |

|               | Nitroxoline 25°C            |                  |                            | Nitroxoline 37°C            |                  |                            |
|---------------|-----------------------------|------------------|----------------------------|-----------------------------|------------------|----------------------------|
| Concentration | ZOI Area (mm <sup>2</sup> ) | Number of Pixels | ZOI Area/ Number of Pixels | ZOI Area (mm <sup>2</sup> ) | Number of Pixels | ZOI Area/ Number of Pixels |
| 10            | 228.21 ± 4.12               | 66.95 ± 0.08     | 3.41 ± 6.15 E-4            | 286.11 ± 5.31               | 73.19 ± 0.04     | 3.91 ± 7.26 E-4            |
| 5             | 210.04 ± 3.18               | 78.06 ± 0.12     | 2.69 ± 3.17 E-3            | 245.53 ± 3.12               | 68.46 ± 0.12     | 3.59 ± 2.55 E-3            |
| 2.5           | 181.93 ± 1.21               | 85.43 ± 0.21     | 2.13 ± 3.13 E-3            | 222.29 ± 4.12               | 80.96 ± 0.03     | 2.75 ± 4.58 E-3            |
| 1.25          | 121.92 ± 1.97               | 97.69 ± 0.04     | 1.25 ± 2.88 E-3            | 143.69 ± 1.92               | 96.8 ± 0.21      | 1.48 ± 6.58 E-4            |
| 0.625         | 50.29 ± 0.92                | 82.99 ± 0.12     | 0.61 ± 4.03 E-4            | 81.14 ± 1.84                | 89.71 ± 0.12     | 0.9 ± 2.32 E-3             |
| 0.3125        | 40.57 ± 1.23                | 74.42 ± 0.06     | 0.55 ± 1.04 E-3            | 31.91 ± 0.98                | 83.96 ± 0.23     | 0.38 ± 6.60 E-4            |
| 0.15625       | 37.19 ± 1.03                | 88.76 ± 0.13     | 0.42 ± 3.99 E-4            | 29.58 ± 0.83                | 94.99 ± 0.14     | 0.31 ± 8.41 E-4            |
| 0.07812       | 32.96 ± 1.08                | 96.82 ± 0.09     | 0.34 ± 5.69 E-4            | 30.85 ± 0.91                | 103.98 ± 0.13    | 0.3 ± 4.87 E-4             |
| DMSO          | 45.72 ± 2.01                | 97.98 ± 0.17     | 0.47 ± 6.34 E-4            | 32.9 ± 1.03                 | 89.64 ± 0.14     | 0.37 ± 6.47 E-4            |

|               | Octanoic Acid 25°C          |                  |                            | Octanoic Acid 37°C          |                  |                            |
|---------------|-----------------------------|------------------|----------------------------|-----------------------------|------------------|----------------------------|
| Concentration | ZOI Area (mm <sup>2</sup> ) | Number of Pixels | ZOI Area/ Number of Pixels | ZOI Area (mm <sup>2</sup> ) | Number of Pixels | ZOI Area/ Number of Pixels |
| 10            | 181.93 ± 2.31               | 72.29 ± 0.12     | 2.52 ± 3.20 E-4            | 31.91 ± 2.03                | 55.49 ± 0.12     | 0.58 ± 3.66 E-4            |
| 5             | 170.52 ± 3.45               | 72.46 ± 0.21     | 2.35 ± 4.37 E-3            | 28.74 ± 1.93                | 69.99 ± 0.11     | 0.41 ± 9.80 E-4            |
| 2.5           | 129.11 ± 1.85               | 79.52 ± 0.19     | 1.62 ± 4.52 E-3            | 26.2 ± 0.23                 | 87.76 ± 0.12     | 0.3 ± 4.00 E-4             |
| 1.25          | 91.71 ± 3.05                | 90.09 ± 0.09     | 1.02 ± 2.49 E-3            | 21.98 ± 0.45                | 100.89 ± 0.03    | 0.22 ± 3.04 E-4            |
| 0.625         | 66.77 ± 2.58                | 83.24 ± 0.19     | 0.8 ± 1.18 E-3             | 18.17 ± 1.25                | 105.58 ± 0.05    | 0.17 ± 1.67 E-4            |
| 0.3125        | 45.64 ± 2.12                | 74 ± 0.29        | 0.62 ± 1.87 E-3            | 14.58 ± 1.02                | 93.09 ± 0.09     | 0.16 ± 1.94 E-4            |
| 0.15625       | 37.19 ± 2.90                | 74.07 ± 0.19     | 0.5 ± 2.36 E-3             | 35.08 ± 1.08                | 94.7 ± 0.12      | 0.37 ± 6.37 E-4            |
| 0.07812       | 24.3 ± 1.76                 | 74.36 ± 0.29     | 0.33 ± 1.07 E-3            | 35.08 ± 1.63                | 95.1 ± 0.15      | 0.37 ± 6.37 E-4            |
| DMSO          | 25 ± 1.07                   | 99.66 ± 0.12     | 0.25 ± 8.37 E-4            | 30.9 ± 1.25                 | 97.67 ± 0.19     | 0.32 ± 6.14 E-4            |
| 0.03906       | 35.08 ± 1.04                | 77.19 ± 0.07     | 0.45 ± 8.41 E-4            | 30.85 ± 1.20                | 91.86 ± 0.09     | 0.34 ± 8.25 E-4            |
| 0.01953       | 32.96 ± 1.29                | 99.15 ± 0.12     | 0.33 ± 3.65 E-4            | 30.85 ± 1.23                | 105.08 ± 0.09    | 0.29 ± 3.69 E-4            |
| 0.009765      | 35.08 ± 1.05                | 107.15 ± 0.32    | 0.33 ± 4.65 E-4            | 29.58 ± 1.40                | 113.21 ± 0.08    | 0.26 ± 3.31 E-4            |
| 0.004883      | 23.67 ± 2.05                | 104.66 ± 0.19    | 0.23 ± 8.87 E-4            | 14.79 ± 1.13                | 110.61 ± 0.08    | 0.13 ± 1.99 E-4            |
| 0.002441      | 26.2 ± 1.67                 | 103.78 ± 0.04    | 0.25 ± 6.23 E-4            | -                           | -                | -                          |
| 0.00061       | 23.67 ± 2.39                | 96.36 ± 0.12     | 0.25 ± 3.50 E-4            | 31.91 ± 1.64                | 77.9 ± 0.12      | 0.41 ± 2.11 E-4            |
| 0.000305      | 23.67 ± 3.12                | 89.45 ± 0.12     | 0.26 ± 7.04 E-4            | 28.74 ± 1.41                | 80.12 ± 0.07     | 0.36 ± 7.13 E-4            |
| 0.000153      | 23.67 ± 1.28                | 90.36 ± 0.09     | 0.26 ± 4.90 E-4            | 29.58 ± 2.20                | 93.09 ± 0.12     | 0.32 ± 4.75 E-4            |
| DMSO          | 27.15 ± 1.08                | 106.06 ± 0.11    | 0.26 ± 3.19 E-4            | 22.01 ± 1.23                | 84.94 ± 0.08     | 0.26 ± 5.11 E-4            |

|               | Octodrine 25°C              |                  |                            | Octodrine 37°C              |                  |                            |
|---------------|-----------------------------|------------------|----------------------------|-----------------------------|------------------|----------------------------|
| Concentration | ZOI Area (mm <sup>2</sup> ) | Number of Pixels | ZOI Area/ Number of Pixels | ZOI Area (mm <sup>2</sup> ) | Number of Pixels | ZOI Area/ Number of Pixels |
| 10            | 35.08 ± 1.32                | 104.46 ± 0.08    | 0.34 ± 1.26 E-4            | 30.23 ± 2.13                | 98.27 ± 0.03     | 0.31 ± 2.17 E-4            |
| 5             | 27.27 ± 1.53                | 116.03 ± 0.09    | 0.24 ± 2.94 E-4            | 23.02 ± 1.94                | 111.36 ± 0.12    | 0.21 ± 2.30 E-4            |
| 2.5           | 28.95 ± 2.15                | 117.33 ± 0.14    | 0.25 ± 3.73 E-4            | 22.61 ± 1.84                | 127.7 ± 0.09     | 0.18 ± 3.10 E-4            |
| 1.25          | 29.23 ± 1.03                | 112 ± 0.18       | 0.26 ± 4.18 E-4            | 21.98 ± 1.59                | 113.1 ± 0.07     | 0.19 ± 2.95 E-4            |
| 0.625         | 28.74 ± 0.94                | 103.63 ± 0.17    | 0.28 ± 5.72 E-4            | 21.98 ± 1.94                | 108.63 ± 0.05    | 0.2 ± 3.09 E-4             |
| 0.3125        | 29.2 ± 1.25                 | 91.87 ± 0.14     | 0.32 ± 7.24 E-4            | 20.82 ± 0.93                | 97.61 ± 0.13     | 0.21 ± 2.05 E-4            |
| 0.15625       | 28.1 ± 1.04                 | 99.05 ± 0.18     | 0.28 ± 5.06 E-4            | 24.3 ± 1.31                 | 101.79 ± 0.08    | 0.24 ± 4.34 E-4            |
| 0.07812       | 27.99 ± 1.23                | 101.65 ± 0.13    | 0.27 ± 6.09 E-4            | 26.2 ± 1.09                 | 96.5 ± 0.09      | 0.27 ± 3.38 E-4            |
| DMSO          | 24.82 ± 1.34                | 106.7 ± 0.09     | 0.23 ± 4.09 E-4            | 27.23 ± 1.32                | 104.64 ± 0.12    | 0.26 ± 3.50 E-4            |

|               | Pyrrithione Zinc 25°C       |                  |                            | Pyrrithione Zinc 37°C       |                  |                            |
|---------------|-----------------------------|------------------|----------------------------|-----------------------------|------------------|----------------------------|
| Concentration | ZOI Area (mm <sup>2</sup> ) | Number of Pixels | ZOI Area/ Number of Pixels | ZOI Area (mm <sup>2</sup> ) | Number of Pixels | ZOI Area/ Number of Pixels |
| 10            | 682.09 ± 6.13               | 99.8 ± 0.23      | 6.83 ± 6.14 E-4            | 587 ± 4.12                  | 80.54 ± 0.36     | 7.29 ± 5.12 E-4            |
| 5             | 390.07 ± 4.12               | 96.65 ± 0.08     | 4.04 ± 0.01                | 425.57 ± 5.68               | 74.46 ± 0.43     | 5.72 ± 0.03                |
| 2.5           | 273 ± 3.31                  | 99.11 ± 0.03     | 2.75 ± 2.56 E-3            | 415.85 ± 3.58               | 86.34 ± 0.22     | 4.82 ± 0.02                |
| 1.25          | 237.51 ± 4.52               | 111.49 ± 0.12    | 2.13 ± 9.79 E-4            | 264.34 ± 1.65               | 91.79 ± 0.32     | 2.88 ± 7.08 E-3            |
| 0.625         | 273 ± 5.23                  | 104.09 ± 0.22    | 2.62 ± 3.53 E-3            | 229.26 ± 1.05               | 82.8 ± 0.12      | 2.77 ± 0.01                |
| 0.3125        | 233.28 ± 2.56               | 86.48 ± 0.18     | 2.7 ± 7.16 E-3             | 45.64 ± 0.98                | 69.1 ± 0.22      | 0.66 ± 1.29 E-3            |
| 0.15625       | 145.8 ± 2.41                | 89.65 ± 0.21     | 1.63 ± 3.53 E-3            | 40.57 ± 1.20                | 67.71 ± 0.08     | 0.6 ± 2.12 E-3             |
| 0.07812       | 37.4 ± 1.98                 | 92.2 ± 0.11      | 0.41 ± 1.14 E-3            | 37.19 ± 1.09                | 85.09 ± 0.09     | 0.44 ± 5.39 E-4            |
| DMSO          | 40.64 ± 2.14                | 114.84 ± 0.08    | 0.35 ± 5.25 E-4            | 5.5 ± 0.68                  | 112.27 ± 0.06    | 0.05 ± 9.98 E-5            |

**Supplemental Table 3: Serial dilution experiments of Octodrine on serum and YPD plates**

| Concentration     | Serum 37°C                  |                  |                               | YPD 37°C                    |                  |                               |
|-------------------|-----------------------------|------------------|-------------------------------|-----------------------------|------------------|-------------------------------|
|                   | ZOI Area (mm <sup>2</sup> ) | Number of Pixels | ZOI Area/<br>Number of Pixels | ZOI Area (mm <sup>2</sup> ) | Number of Pixels | ZOI Area/<br>Number of Pixels |
| 6000 mM<br>(Neat) | 2593.32 ± 6.21              | 113.67 ± 0.12    | 22.81 ± 5.46 E-4              | 1154.21 ± 2.31              | 71.29 ± 0.43     | 16.19 ± 3.24 E-4              |
| 3000 mM           | 914.11 ± 4.22               | 103.23 ± 0.32    | 8.86 ± 0.01                   | 545.84 ± 2.54               | 76.92 ± 0.23     | 7.10 ± 0.04                   |
| 1500 mM           | 635.61 ± 2.31               | 85.25 ± 0.32     | 7.46 ± 0.03                   | 164.23 ± 3.24               | 74.12 ± 0.42     | 2.22 ± 7.31 E-3               |
| 750 mM            | 378.21 ± 3.12               | 98.45 ± 0.32     | 3.84 ± 0.01                   | 61.24 ± 1.21                | 76.78 ± 0.03     | 0.80 ± 4.52 E-3               |
| 375 mM            | 109.83 ± 1.41               | 90.42 ± 0.23     | 1.21 ± 4.45 E-3               | 28.32 ± 2.12                | 64.23 ± 0.32     | 0.44 ± 5.36 E-4               |
| 187.50 mM         | 73.83 ± 1.12                | 91.43 ± 0.53     | 0.81 ± 2.15 E-3               | 26.12 ± 1.23                | 59.32 ± 0.21     | 0.44 ± 2.58 E-3               |
| 93.75 mM          | 54.55 ± 2.12                | 71.52 ± 0.15     | 0.76 ± 5.95 E-3               | 27.98 ± 2.31                | 60.21 ± 0.23     | 0.46 ± 2.00 E-3               |
| 46.88 mM          | 40.1 ± 2.12                 | 75.23 ± 0.21     | 0.53 ± 1.34 E-3               | 26.94 ± 2.53                | 61.32 ± 0.23     | 0.44 ± 2.06 E-3               |
| 23.44 mM          | 20.29 ± 1.32                | 83.98 ± 0.34     | 0.24 ± 7.61 E-4               | 23.41 ± 1.23                | 60.12 ± 0.23     | 0.39 ± 1.69 E-3               |
| 11.72 mM          | 24.12 ± 2.32                | 84.21 ± 0.25     | 0.29 ± 1.43 E-3               | 22.41 ± 2.31                | 62.43 ± 0.37     | 0.36 ± 3.70 E-4               |
| 5.86 mM           | 26.21 ± 2.56                | 79.21 ± 0.32     | 0.33 ± 1.37 E-3               | 20.31 ± 1.25                | 57.23 ± 0.21     | 0.35 ± 2.51 E-3               |
| 2.30 mM           | 22.58 ± 1.42                | 73.92 ± 0.23     | 0.31 ± 1.51 E-3               | 18.33 ± 2.31                | 65.21 ± 0.32     | 0.28 ± 1.26 E-3               |
| DMSO              | -                           | -                | -                             | 16.23 ± 0.21                | 62.12 ± 0.32     | 0.26 ± 3.38 E-5               |

**Supplemental Table 4: Quantification of the zone of inhibition of Octodrine in neat form against *Candida albicans*, *Escherichia coli* and *Bacillus cereus*.**

| Species                 | ZOI Area (mm <sup>2</sup> ) | Number of Pixels | ZOI Area/Number of Pixels |
|-------------------------|-----------------------------|------------------|---------------------------|
| <b>Candida albicans</b> | 2852.79 ± 8.31              | 86.48 ± 0.35     | 32.99 ± 9.61 E-4          |
| <b>Bacillus cereus</b>  | 329.92 ± 7.31               | 58.54 ± 0.24     | 5.64 ± 0.03               |
| <b>Escherichia coli</b> | 764.11 ± 8.45               | 70.34 ± 0.23     | 10.86 ± 0.04              |

Supplemental Figure 1: Elucidation of *Candida albicans* sensitivity to Octodrine

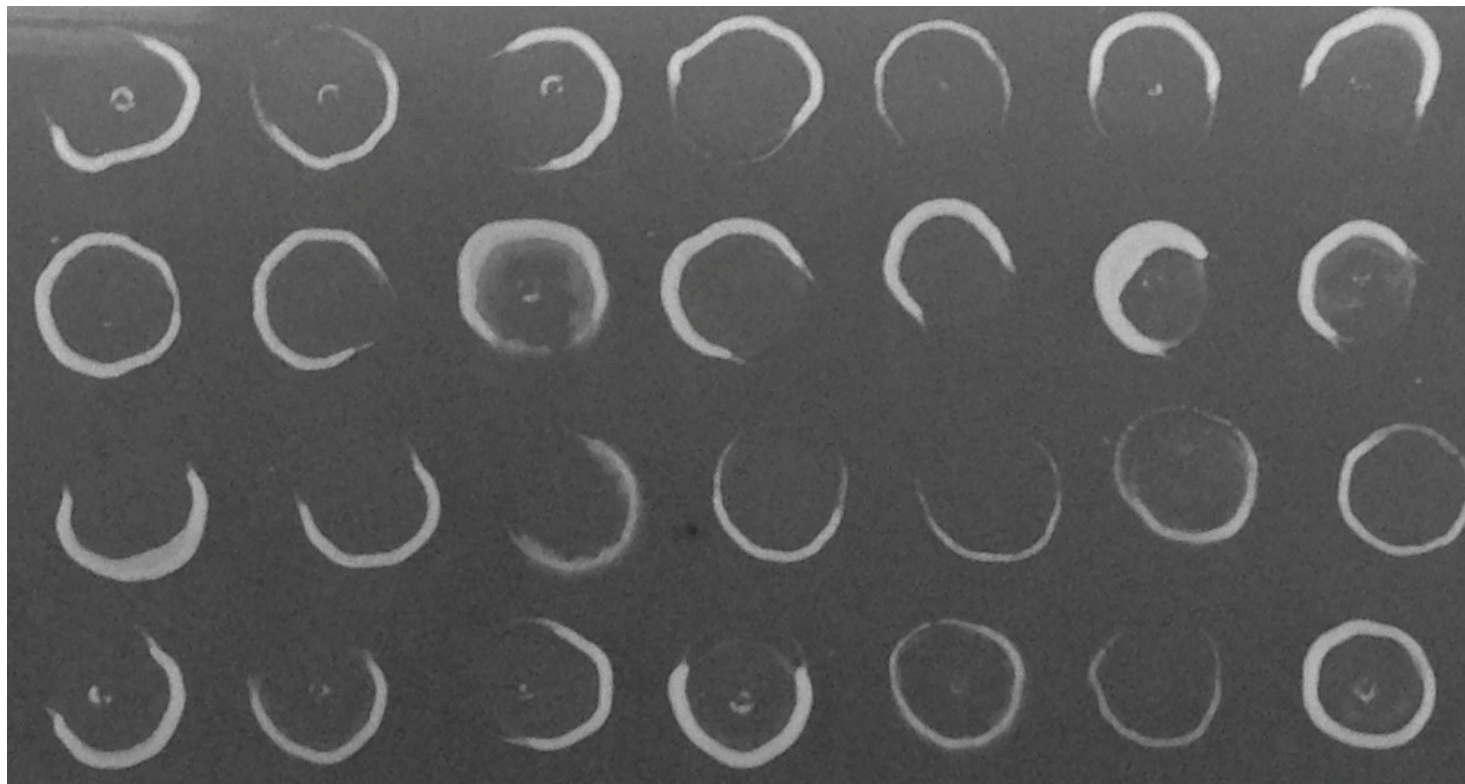

Supplement: 12941_2015_90_MOESM1_ESM.pdf [file 12941_2015_90_MOESM1_ESM.pdf]
